# Supplementary material
Source: HighWire-hosted journal article supplement (https://erj.ersjournals.com/content/55/6/1902138)
Supplement: inline-supplementary-material-1 [file inline-supplementary-material-1.pdf]

## **ONLINE MATERIAL**

### **Manuscript: Association between physical activity and risk of hospitalisation in bronchiectasis**

Alcaraz-Serrano V<sup>1\*</sup>, Gimeno-Santos E<sup>2,3\*</sup>, Scioscia G<sup>4</sup>, Gabarrús A<sup>1</sup>, Navarro A<sup>5</sup>, Herrero-Cortina B<sup>6,7</sup>, Amaro R<sup>8</sup>, Fernández-Barat L<sup>1</sup>, Torres A<sup>1,8</sup>

\* Both authors contributed equally to this study

**Conflict of interest:** None declared

### **Correspondence author**

Dr. Elena Gimeno-Santos,

Respiratory Clinic Institute, Hospital Clinic de Barcelona, Institut d'Investigacions

Biomèdiques August Pi i Sunyer (IDIBAPS),

Carrer Villarroel, 170, 08036 Barcelona, Spain

E-mail: elenagimeno@gmail.com

## Index

|                                                                                                                                                                                                 |    |
|-------------------------------------------------------------------------------------------------------------------------------------------------------------------------------------------------|----|
| Online Table S1. Crude and adjusted associations between level of physical activity in steps per day and sedentary time with bronchiectasis hospitalisations. ....                              | 3  |
| Online Table S2. Crude and adjusted associations between level of physical activity in steps per day and sedentary time excluding patients with a smoking history of $\geq 10$ packs/year. .... | 5  |
| Online Table S3. Physical activity baseline characteristics of hospitalised vs. non-hospitalised bronchiectasis patients including weekend data. ....                                           | 7  |
| Online Table S4. Steps per day, sedentary time, moderate PA and MVPA cut-off points for hospitalisation including weekend data. ....                                                            | 8  |
| Figure S1. Kaplan-Meier graphics according to ROC curve cut-off points including weekend data. ....                                                                                             | 9  |
| Online Table S5. Crude and adjusted associations between level of physical activity in steps per day and sedentary time and bronchiectasis hospitalisations including weekend data. ....        | 10 |

**Online Table S1. Crude and adjusted associations between level of physical activity in steps per day and sedentary time with bronchiectasis hospitalisations.**

|                                                      | N  | Crude OR (95% CI)    | p value | Adjusted OR (95% CI) <sup>a</sup> | p value | Adjusted OR (95% CI) <sup>b</sup> | p value | Adjusted OR (95% CI) <sup>c</sup> | p value | Adjusted OR (95% CI) <sup>d</sup> | p value |
|------------------------------------------------------|----|----------------------|---------|-----------------------------------|---------|-----------------------------------|---------|-----------------------------------|---------|-----------------------------------|---------|
| <b>Steps per day</b>                                 |    |                      |         |                                   |         | -                                 | -       |                                   |         | -                                 | -       |
| High physical activity (≥6,290 steps per day)        | 43 | 1.00                 |         | 1.00                              |         | -                                 | -       | 1.00                              |         | -                                 | -       |
| Low physical activity (<6,290 steps per day)         | 21 | 4.62 (1.36 to 15.68) | 0.014   | 4.20 (0.82 to 21.47)              | 0.085   | -                                 | -       | 3.37 (0.85 to 13.39)              | 0.085   | -                                 | -       |
| <b>Sedentary time</b>                                |    |                      |         | -                                 | -       |                                   |         | -                                 | -       |                                   |         |
| Sedentary (≥7.8h)                                    | 24 | 7.62 (2.06 to 28.18) | 0.002   | -                                 | -       | 5.91 (1.26 to 27.81)              | 0.024   | -                                 | -       | 5.34 (1.29 to 22.46)              | 0.020   |
| No sedentary (<7.8h)                                 | 40 | 1.00                 |         | -                                 | -       | 1.00                              |         | -                                 | -       | 1.00                              |         |
| <b>Age (+1 year)</b>                                 | 64 | 1.01 (0.97 to 1.05)  | 0.646   | 0.99 (0.94 to 1.04)               | 0.681   | 0.99 (0.94 to 1.05)               | 0.804   | -                                 | -       | -                                 | -       |
| <b>Gender</b>                                        |    |                      |         |                                   |         |                                   |         |                                   |         |                                   |         |
| Male                                                 | 21 | 1.00                 |         | 1.00                              |         | 1.00                              |         | 1.00                              |         | 1.00                              |         |
| Female                                               | 43 | 0.66 (0.20 to 2.19)  | 0.500   | 0.55 (0.13 to 2.42)               | 0.432   | 0.83 (0.19 to 3.68)               | 0.802   | 0.76 (0.18 to 3.37)               | 0.715   | 1.14 (0.27 to 4.77)               | 0.861   |
| <b><i>Pseudomonas aeruginosa</i></b>                 |    |                      |         |                                   |         |                                   |         | -                                 | -       | -                                 | -       |
| No                                                   | 45 | 1.00                 |         | 1.00                              |         | 1.00                              |         | -                                 | -       | -                                 | -       |
| Yes                                                  | 19 | 8.89 (2.44 to 32.43) | 0.001   | 5.83 (1.35 to 25.16)              | 0.018   | 6.82 (1.56 to 29.94)              | 0.011   | -                                 | -       | -                                 | -       |
| <b>Hospitalisations 12 months prior to the study</b> |    |                      |         |                                   |         |                                   |         | -                                 | -       | -                                 | -       |
| No                                                   | 51 | 1.00                 |         | 1.00                              |         | 1.00                              |         | -                                 | -       | -                                 | -       |
| Yes                                                  | 13 | 6.27 (1.66 to 23.62) | 0.007   | 6.70 (1.38 to 32.65)              | 0.018   | 5.65 (1.12 to 28.44)              | 0.036   | -                                 | -       | -                                 | -       |
| <b>MRC Dyspnoea Scale</b>                            |    |                      | 0.347   | -                                 | -       | -                                 | -       | -                                 | -       | -                                 | -       |
| 1                                                    | 12 | 1.00                 |         | -                                 | -       | -                                 | -       | -                                 | -       | -                                 | -       |
| 2                                                    | 39 | 2.41 (0.27 to 21.81) | 0.435   | -                                 | -       | -                                 | -       | -                                 | -       | -                                 | 3       |
| 3                                                    | 10 | 7.33 (0.66 to 81.36) | 0.105   | -                                 | -       | -                                 | -       | -                                 | -       | -                                 | -       |

|                               |    |                       |       |   |   |   |   |                      |       |                     |       |
|-------------------------------|----|-----------------------|-------|---|---|---|---|----------------------|-------|---------------------|-------|
| 4                             | 3  | -                     | -     | - | - | - | - | -                    | -     | -                   | -     |
| <b>FEV<sub>1</sub> (+1 %)</b> | 64 | 0.97 (0.94 to 1.00)   | 0.034 | - | - | - | - | -                    | -     | -                   | -     |
| <b>BSI stage</b>              |    |                       | 0.004 | - | - | - | - |                      | 0.022 |                     | 0.035 |
| Mild                          | 23 | 1.00                  |       | - | - | - | - | 1.00                 |       | 1.00                |       |
| Moderate                      | 22 | 1.66 (0.25 to 11.02)  | 0.601 | - | - | - | - | 1.46 (0.20 to 10.43) | 0.707 | 1.99 (0.27 to 14.5) | 0.495 |
| Severe                        | 19 | 11.67 (2.12 to 64.33) | 0.005 | - | - | - | - | 8.35 (1.43 to 48.71) | 0.018 | 8.79 (1.47 to 52.5) | 0.017 |
| <b>6MWT (+1 meter)</b>        | 64 | 0.99 (0.99 to 1.00)   | 0.056 | - | - | - | - | -                    | -     | -                   | -     |

Abbreviations. OR: odds-ratio; CI: confidence interval; h: hours; MRC: medical research council; FEV<sub>1</sub>: forced expiratory volume in one second; BSI: bronchiectasis severity index; 6MWT: 6 minutes walking test.

Data are shown as estimated ORs (95% CIs) of the explanatory variables in the low level of physical activity group. The OR represents the odds that low level of physical activity will occur given exposure to the explanatory variable, compared to the odds of the outcome occurring in the absence of that exposure. The P-values are based on the null hypothesis that all ORs relating to an explanatory variable are equal to unity (no effect).

<sup>a</sup> Initial multivariable model comprised age, gender, chronic colonisation by *Pseudomonas aeruginosa*, hospitalisations 12 months prior to the study, MRC Dyspnoea Scale, FEV<sub>1</sub> %predicted, BSI stage and 6MWT. Final multivariable model was adjusted for age, gender, chronic colonisation by *Pseudomonas aeruginosa* and hospitalisations 12 months prior to the study. Hosmer–Lemeshow goodness-of-fit test for the multivariable model, p = 0.85. Area under the ROC curve for the multivariable model, AUC = 0.86 (0.76 to 0.97).

<sup>b</sup> Initial multivariable model comprised age, gender, chronic colonisation by *Pseudomonas aeruginosa*, hospitalisations 12 months prior to the study, MRC Dyspnoea Scale, FEV<sub>1</sub> %predicted, BSI stage and 6MWT. Final multivariable model was adjusted for age, gender, chronic colonisation by *Pseudomonas aeruginosa* and hospitalisations 12 months prior to the study. Hosmer–Lemeshow goodness-of-fit test for the multivariable model, p = 0.78. Area under the ROC curve for the multivariable model, AUC = 0.87 (0.76 to 0.97).

<sup>c</sup> Initial multivariable model comprised gender and BSI stage. Final multivariable model was adjusted for gender and BSI. Hosmer–Lemeshow goodness-of-fit test for the multivariable model, p = 0.986. Area under the ROC curve for the multivariable model, AUC = 0.80 (0.67 to 0.94).

<sup>d</sup> Initial multivariable model comprised gender and BSI stage. Final multivariable model was adjusted for gender and BSI. Hosmer–Lemeshow goodness-of-fit test for the multivariable model, p = 0.606. Area under the ROC curve for the multivariable model, AUC = 0.81 (0.67 to 0.95).

**Online Table S2. Crude and adjusted associations between level of physical activity in steps per day and sedentary time excluding patients with  $\geq 10$  pack/year of tobacco.**

|                                                      | N  | Crude OR (95% CI)    | p value | Adjusted OR (95% CI) <sup>a</sup> | p value | Adjusted OR (95% CI) <sup>b</sup> | p value |
|------------------------------------------------------|----|----------------------|---------|-----------------------------------|---------|-----------------------------------|---------|
| <b>Steps per day</b>                                 |    |                      |         |                                   |         | -                                 | -       |
| High physical activity ( $\geq 6,290$ steps per day) | 36 | 1.00                 |         | 1.00                              |         | -                                 | -       |
| Low physical activity ( $< 6,290$ steps per day)     | 12 | 4.43 (1.00 to 19.58) | 0.050   | 8.7 (1.16 to 65.01)               | 0.035   | -                                 | -       |
| <b>Sedentary time</b>                                |    |                      |         | -                                 | -       |                                   |         |
| Sedentary ( $\geq 7.8$ h)                            | 14 | 5.62 (1.27 to 24.86) | 0.023   | -                                 | -       | 5.54 (0.77 to 40.01)              | 0.089   |
| No sedentary ( $< 7.8$ h)                            | 34 | 1.00                 |         | -                                 | -       | 1.00                              |         |
| <b>Age (+1 year)</b>                                 | 48 | 0.983 (0.94 to 1.03) | 0.450   | 0.94 (0.88 to 1.00)               | 0.056   | 0.95 (0.88 to 1.02)               | 0.169   |
| <b>Gender</b>                                        |    |                      |         |                                   |         |                                   |         |
| Male                                                 | 15 | 1.00                 |         | 1.00                              |         | 1.00                              |         |
| Female                                               | 33 | 1.07 (0.24 to 4.90)  | 0.924   | 1.34 (0.17 to 10.46)              | 0.778   | 1.19 (0.15 to 9.65)               | 0.870   |
| <b><i>Pseudomonas aeruginosa</i></b>                 |    |                      |         | -                                 | -       |                                   |         |
| No                                                   | 34 | 1.00                 |         | -                                 | -       | 1.00                              |         |
| Yes                                                  | 14 | 10.3 (2.13 to 50.26) | 0.004   | -                                 | -       | 8.50 (1.14 to 63.39)              | 0.037   |
| <b>Hospitalisations 12 months prior to the study</b> |    |                      |         |                                   |         |                                   |         |
| No                                                   | 37 | 1.00                 |         | 1.00                              |         | 1.00                              |         |
| Yes                                                  | 11 | 9.90 (2.05 to 47.89) | 0.004   | 19.3 (2.39 to 155.6)              | 0.005   | 15.93 (1.60 to 158.3)             | 0.018   |
| <b>FEV<sub>1</sub> (+1 %)</b>                        | 48 | 0.97 (0.94 to 1.00)  | 0.217   | -                                 | -       | -                                 | -       |
| <b>BSI stage</b>                                     |    |                      | 0.071   | -                                 | -       | -                                 | -       |
| Mild                                                 | 15 | 1.00                 |         | -                                 | -       | -                                 | -       |
| Moderate                                             | 19 | 2.62 (0.24 to 28.19) | 0.426   | -                                 | -       | -                                 | -       |

|                        |    |                      |       |   |   |   |   |
|------------------------|----|----------------------|-------|---|---|---|---|
| Severe                 | 14 | 10.5 (1.06 to 103.5) | 0.044 | - | - | - | - |
| <b>6MWT (+1 meter)</b> | 48 | 0.99 (0.98 to 1.00)  | 0.336 | - | - | - | - |

Abbreviations. OR: odds-ratio; CI: confidence interval; h: hours; MRC: medical research council; FEV<sub>1</sub>: forced expiratory volume in one second; BSI: bronchiectasis severity index; 6MWT: 6 minutes walking test.

Data are shown as estimated ORs (95% CIs) of the explanatory variables in the low level of physical activity group. The OR represents the odds that low level of physical activity will occur given exposure to the explanatory variable, compared to the odds of the outcome occurring in the absence of that exposure. The P-values are based on the null hypothesis that all ORs relating to an explanatory variable are equal to unity (no effect).

<sup>a</sup> Initial multivariable model comprised age, gender, chronic colonisation by *Pseudomonas aeruginosa*, hospitalisations 12 months prior to the study, MRC Dyspnoea Scale, FEV<sub>1</sub> %predicted, BSI stage and 6MWT. Final multivariable model was adjusted for age, gender, chronic colonisation by *Pseudomonas aeruginosa* and hospitalisations 12 months prior to the study. Hosmer–Lemeshow goodness-of-fit test for the multivariable model,  $p = 0.76$ . Area under the ROC curve for the multivariable model, AUC = 0.87 (0.75 to 0.98).

<sup>b</sup> Initial multivariable model comprised age, gender, chronic colonisation by *Pseudomonas aeruginosa*, hospitalisations 12 months prior to the study, MRC Dyspnoea Scale, FEV<sub>1</sub> %predicted, BSI stage and 6MWT. Final multivariable model was adjusted for age, gender, chronic colonisation by *Pseudomonas aeruginosa* and hospitalisations 12 months prior to the study. Hosmer–Lemeshow goodness-of-fit test for the multivariable model,  $p = 0.35$ . Area under the ROC curve for the multivariable model, AUC = 0.89 (0.78 to 1.00).

**Online Table S3. Physical activity baseline characteristics of hospitalised vs. non-hospitalised bronchiectasis patients including weekend data.**

|                                     | All patients  | Hospitalised    | Non-hospitalised | p value      |
|-------------------------------------|---------------|-----------------|------------------|--------------|
|                                     | N=64          | N=15 (23%)      | N=49 (77%)       |              |
| <b>Physical Activity</b>            |               |                 |                  |              |
| Light PA, 1.6 - <3.0 MET-min/day    | 211.4 (75.9)  | 184.3 (37.0)    | 220.2 (82.8)     | 0.110        |
| Moderate PA, 3.0 - <6.0 MET-min/day | 112.9 (80)    | 84.4 (64)       | 121.6 (82.8)     | 0.050        |
| Vigorous PA, 6.0 - <8.7 MET-min/day | 0.81 (2.17)   | 0.4 (1.1)       | 0.9 (2.4)        | 0.486        |
| MVPA, min/day                       | 113.9 (80.6)  | 85.1 (64.5)     | 122.7 (83.5)     | <b>0.047</b> |
| Steps per day                       | 6,933 (3,345) | 5,156.11 (3464) | 7,477.4 (3,146)  | <b>0.019</b> |
| Sedentary time, hours per day       | 7.51 (1.77)   | 8.53 (1.52)     | 7.21 (1.74)      | <b>0.018</b> |

Data are presented as n (%), mean (SD) or median (P<sub>25</sub>;P<sub>75</sub>). \*Data presented as mean (SD), and range.

Abbreviations. BMI: body mass index; MRC: medical research council; COPD: chronic obstructive pulmonary disease; BSI: bronchiectasis severity index; FEV<sub>1</sub>: forced expiratory volume in one second; FVC: forced vital capacity; 6MWT: 6 minutes walking test; PA: physical activity; MET: metabolic equivalent tasks; MVPA: moderate-to-vigorous physical activity.

<sup>a</sup> Could have more than one medication.

**Online Table S4. Steps per day, sedentary time, moderate PA and MVPA cut-off points for hospitalisation including weekend data.**

| Hospitalisation variable      | AUC (95% CI)        | Sensitivity (%) | Specificity (%) | Best Cut-off | p value |
|-------------------------------|---------------------|-----------------|-----------------|--------------|---------|
| <b>Steps per day</b>          | 0.71 (0.54 to 0.87) | 65              | 67              | 5,919        | 0.017   |
| <b>Sedentary time (hours)</b> | 0.72 (0.57 to 0.87) | 73              | 63              | 7.86         | 0.009   |
| <b>Moderate PA (min)</b>      | 0.67 (0.50 to 0.84) | 61              | 60              | 89.6         | 0.050   |
| <b>MVPA (min)</b>             | 0.67 (0.50 to 0.84) | 61              | 60              | 89.9         | 0.047   |

Abbreviations. AUC: area under the curve; CI: confidence interval; PA: physical activity; min: minutes; MVPA: moderate-to-vigorous physical activity.



**Figure S1. Kaplan-Meier graphics according to ROC curve cut-off points including weekend data.**  
 1A.  $<5919$  steps per day; 1B.  $\geq 7.86$  hours of sedentary behaviour.

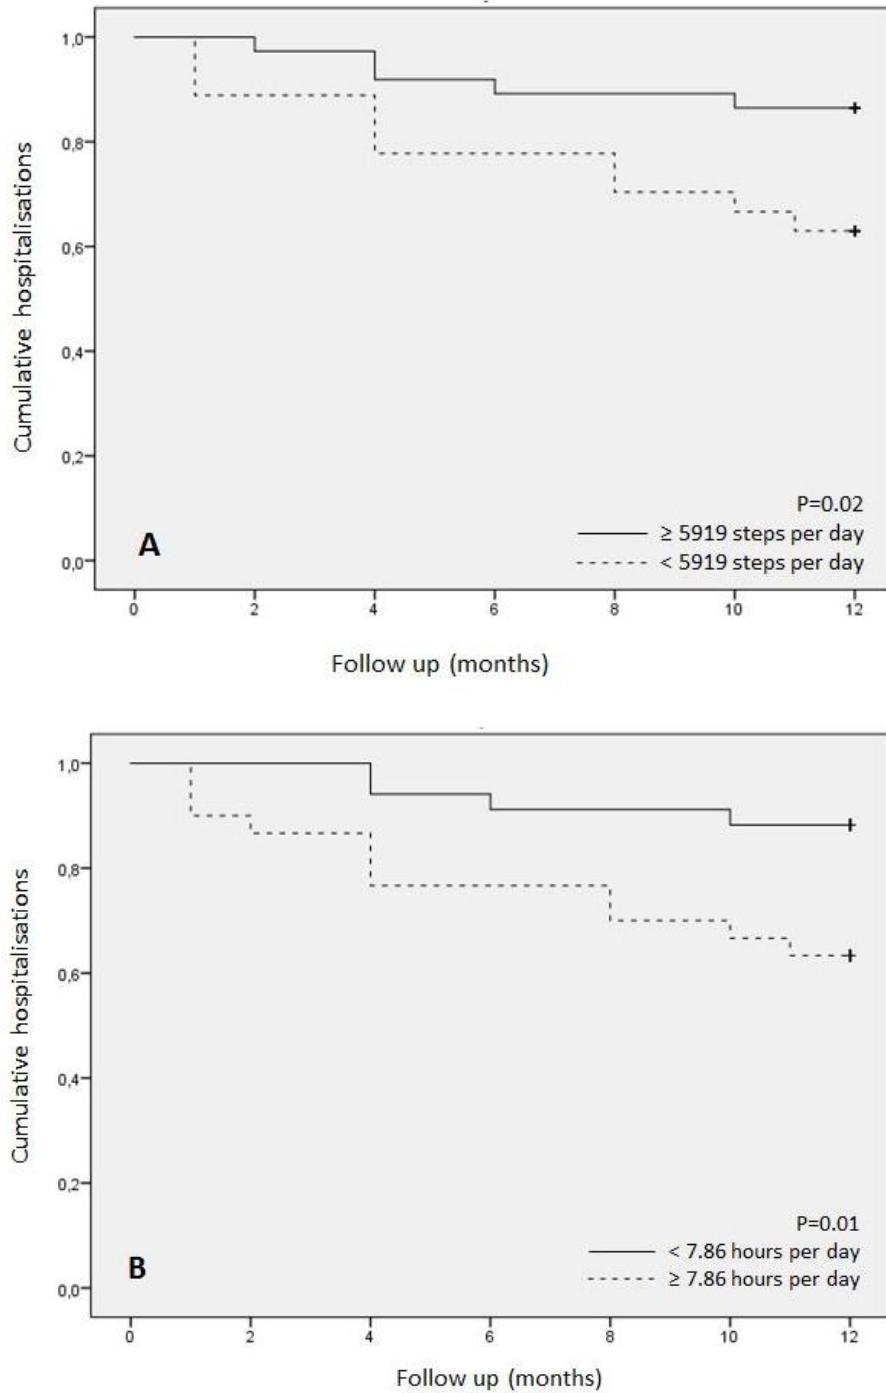

**Online Table S5. Crude and adjusted associations between level of physical activity in steps per day and sedentary time and bronchiectasis hospitalisations including weekend data.**

|                                                      | N  | Crude OR (95% CI)    | p value | Adjusted OR (95% CI) <sup>a</sup> | p value | Adjusted OR (95% CI) <sup>b</sup> | p value |
|------------------------------------------------------|----|----------------------|---------|-----------------------------------|---------|-----------------------------------|---------|
| <b>Steps per day</b>                                 |    |                      |         |                                   |         | -                                 | -       |
| High physical activity ( $\geq 5,919$ steps per day) | 37 | 1.00                 |         | 1.00                              |         | -                                 | -       |
| Low physical activity ( $< 5,919$ steps per day)     | 27 | 3.76 (1.11 to 12.80) | 0.034   | 4.75 (0.89 to 25.48)              | 0.069   | -                                 | -       |
| <b>Sedentary time</b>                                |    |                      |         | -                                 | -       |                                   |         |
| Sedentary ( $\geq 7.8$ h)                            | 34 | 4.34 (1.21 to 15.63) | 0.025   | -                                 | -       | 2.96 (0.66 to 13.30)              | 0.158   |
| Non-sedentary ( $< 7.8$ h)                           | 30 | 1.00                 |         | -                                 | -       | 1.00                              |         |
| <b>Age (+1 year)</b>                                 | 64 | 1.01 (0.97 to 1.05)  | 0.646   | 0.99 (0.94 to 1.04)               | 0.717   | 1.00 (0.95 to 1.05)               | 0.977   |
| <b>Gender</b>                                        |    |                      | 0.500   |                                   | 0.429   |                                   | 0.592   |
| Male                                                 | 21 | 1.00                 |         | 1.00                              |         | 1.00                              |         |
| Female                                               | 43 | 0.66 (0.20 to 2.19)  |         | 0.55 (0.12 to 2.44)               |         | 0.68 (0.16 to 2.84)               |         |
| <b><i>Pseudomonas aeruginosa</i></b>                 |    |                      | 0.001   |                                   | 0.014   |                                   | 0.007   |
| No                                                   | 45 | 1.00                 |         | 1.00                              |         | 1.00                              |         |
| Yes                                                  | 19 | 8.89 (2.44 to 32.43) |         | 6.12 (1.44 to 26.04)              |         | 7.17 (1.72 to 29.79)              |         |
| <b>Hospitalisations 12 months prior to the study</b> |    |                      | 0.007   |                                   | 0.013   |                                   | 0.028   |
| No                                                   | 51 | 1.00                 |         | 1.00                              |         | 1.00                              |         |
| Yes                                                  | 13 | 6.27 (1.66 to 23.62) |         | 8.22 (1.55 to 43.62)              |         | 5.57 (1.21 to 25.75)              |         |
| <b>MRC Dyspnoea Scale</b>                            |    |                      | 0.347   | -                                 | -       | -                                 | -       |
| 1                                                    | 12 | 1.00                 |         | -                                 | -       | -                                 | -       |
| 2                                                    | 39 | 2.41 (0.27 to 21.81) | 0.435   | -                                 | -       | -                                 | -       |

|                               |    |                       |       |   |   |   |   |
|-------------------------------|----|-----------------------|-------|---|---|---|---|
| 3                             | 10 | 7.33 (0.66 to 81.36)  | 0.105 | - | - | - | - |
| 4                             | 3  | -                     | -     | - | - | - | - |
| <b>FEV<sub>1</sub> (+1 %)</b> | 64 | 0.97 (0.94 to 1.00)   | 0.034 | - | - | - | - |
| <b>BSI stage</b>              |    |                       | 0.004 | - | - | - | - |
| Mild                          | 23 | 1.00                  |       | - | - | - | - |
| Moderate                      | 22 | 1.66 (0.25 to 11.02)  | 0.601 | - | - | - | - |
| Severe                        | 19 | 11.67 (2.12 to 64.33) | 0.005 | - | - | - | - |
| <b>6MWT (+1 meter)</b>        | 64 | 0.99 (0.99 to 1.00)   | 0.050 | - | - | - | - |

Abbreviations. OR: odds-ratio; CI: confidence interval; h: hours; MRC: medical research council; FEV<sub>1</sub>: forced expiratory volume in one second; BSI: bronchiectasis severity index; 6MWT: 6 minutes walking test.

Data are shown as estimated ORs (95% CIs) of the explanatory variables in the low level of physical activity group. The OR represents the odds that low level of physical activity will occur given exposure to the explanatory variable, compared to the odds of the outcome occurring in the absence of that exposure. The P-values are based on the null hypothesis that all ORs relating to an explanatory variable are equal to unity (no effect).

<sup>a</sup> Initial multivariable model comprised age, gender, chronic colonisation by *Pseudomonas aeruginosa*, hospitalisations 12 months prior to the study, MRC Dyspnoea Scale, FEV<sub>1</sub> %predicted, BSI stage and 6MWT. Final multivariable model was adjusted for age, gender, chronic colonisation by *Pseudomonas aeruginosa* and hospitalisations 12 months prior to the study. Hosmer–Lemeshow goodness-of-fit test for the multivariable model,  $p = 0.27$ . Area under the ROC curve for the multivariable model, AUC = 0.86 (0.75 to 0.97).

<sup>b</sup> Initial multivariable model comprised age, gender, chronic colonisation by *Pseudomonas aeruginosa*, hospitalisations 12 months prior to the study, MRC Dyspnoea Scale, FEV<sub>1</sub> %predicted, BSI stage and 6MWT. Final multivariable model was adjusted for age, gender, chronic colonisation by *Pseudomonas aeruginosa* and hospitalisations 12 months prior to the study. Hosmer–Lemeshow goodness-of-fit test for the multivariable model,  $p = 0.14$ . Area under the ROC curve for the multivariable model, AUC = 0.84 (0.72 to 0.96).
